# Supplementary material
Source: publisher site journal article supplement (https://www.spandidos-publications.com/8225/downloadSupplementary)
Supplement: Supplementary file 1 [file downloadSupplementary]

## Sheet: Table S4
Table SIV. Correlation coefficients between insulin-like growth factor 1 receptor expression and immune infiltration profiles across pan-cancer datasets.
Cancer type	aDC	B cells	CD8 T cells	Cytotoxic cells	DC	Eosinophils	iDC	Macrophages	Mast cells	Neutrophils	NK CD56bright cells	NK CD56dim cells	NK cells	pDC	T cells	T helper cells	Tcm	Tem	TFH	Tgd	Th1 cells	Th17 cells	Th2 cells	TReg
ACC	0.000803311	-0.280915	-0.148783	-0.247882	-0.153165	-0.157498	-0.206475	-0.145034	-0.334323	-0.12724	-0.335005	-0.238827	-0.07926	-0.48184	-0.22814	0.220935	-0.0221519	-0.00141188	-0.311758	0.0299416	-0.279211	-0.0894839	0.243768	-0.194961
BLCA	0.0507274	-0.119895	-0.0925838	-0.0958724	-0.159577	0.0431077	-0.00814169	0.073745	0.0356148	0.0646679	-0.295291	0.0995594	0.057461	-0.295956	-0.0516226	0.100961	0.379007	0.102398	-0.119401	0.138641	0.110854	-0.0251215	0.146422	-0.00663453
BRCA	-0.397073	-0.396288	-0.171876	-0.370207	-0.390608	0.362393	-0.113737	-0.311695	0.149432	-0.230485	0.111193	-0.355761	0.215555	-0.171372	-0.305977	0.108431	0.204222	-0.0687752	-0.211856	0.0941028	-0.414315	0.114736	-0.110026	-0.403728
CESC	-0.152322	-0.309204	-0.140958	-0.156964	-0.172685	-0.0341717	-0.108428	-0.00226055	0.0204949	0.0279376	-0.112892	-0.00261696	0.0877138	-0.3681	-0.199996	0.0333123	0.209607	-0.103291	-0.239201	0.161292	-0.0770621	0.0152941	0.126678	-0.113763
CHOL	0.219048	0.202241	-0.112885	-0.267227	0.00448179	-0.266947	0.143137	0.352941	0.221569	0.265826	-0.201681	-0.289076	0.206162	-0.298039	-0.0134454	0.346779	0.376751	0.296919	0.0436975	-0.0352941	0.0495798	0.0123249	0.104202	-0.00588235
COAD	-0.100624	-0.0425996	-0.0433972	-0.0799145	0.00717527	0.116392	0.0462295	0.157504	0.0664109	-0.00778877	-0.0616821	0.0207477	0.275937	0.0516861	-0.106673	0.106487	0.369547	0.286601	0.109213	0.053491	-0.0357897	-0.270821	-0.160832	0.0119371
DLBC	0.220799	-0.183456	0.17119	0.0908597	-0.109422	0.0471125	-0.251628	0.167716	-0.043096	0.198111	-0.205493	0.174772	0.148502	0.100413	0.113439	0.507056	0.239904	-0.120386	0.199522	-0.13363	0.148285	0.189535	0.123317	0.194095
ESCA	0.0651515	-0.233467	-0.173597	0.0464944	0.0655117	-0.30221	0.0900322	0.189951	-0.0793473	-0.0219268	-0.262582	0.22074	0.365388	-0.296265	-0.147267	0.00631231	0.412392	-0.129641	0.0343464	0.209478	0.160388	-0.461431	0.377384	0.0539401
GBM	-0.302608	-0.263279	0.0876088	-0.345077	-0.13464	-0.0509845	-0.181905	-0.195696	-0.189245	-0.132778	0.0605539	0.0517354	0.292524	0.0355353	-0.325675	0.208055	0.435105	0.33646	0.1514	0.182462	-0.0439287	-0.0952936	0.101502	-0.0397121
HNSC	-0.205967	-0.175815	-0.178016	-0.287082	-0.15355	0.240643	-0.0112798	0.109706	0.0644678	0.0141348	0.00677308	-0.192393	0.252281	-0.233566	-0.21149	0.0543567	0.281982	0.193075	-0.013947	0.0487521	-0.0535178	-0.115567	0.215491	-0.0533889
KICH	0.0847902	-0.234222	0.0365822	-0.241871	-0.287806	-0.00388986	-0.420061	-0.166958	-0.0409965	-0.150306	-0.165953	-0.242045	-0.232998	-0.29375	-0.0858392	0.14174	0.443357	-0.125743	0.0125437	-0.0443182	-0.2816	-0.255201	-0.101399	-0.285708
KIRC	-0.265361	-0.194684	-0.124018	-0.346818	-0.0564986	0.179168	0.0719654	-0.0187548	0.266319	0.211429	-0.420325	-0.0948108	0.162565	0.0283177	-0.273269	0.112439	0.345208	0.179066	-0.202748	0.0978163	-0.1993	0.35764	-0.157705	-0.384088
KIRP	-0.162859	-0.261947	-0.162774	-0.366071	-0.227825	0.140649	-0.204717	-0.158494	0.0615041	-0.228814	-0.339008	-0.253524	0.00609596	-0.386733	-0.167555	0.365812	0.497758	0.133155	-0.169391	0.0272721	-0.0492961	-0.0146404	-0.0471626	-0.186864
LAML	-0.0509125	-0.0473959	0.25857	0.132616	-0.270193	-0.0657505	-0.229896	-0.29711	0.275545	-0.230586	0.135393	-0.0196009	0.409296	0.00870269	0.152346	0.330864	0.265646	-0.162587	0.188561	-0.183061	0.0912485	-0.125881	-0.112295	-0.017384
LGG	-0.143656	-0.129909	0.135792	-0.252048	-0.066915	-0.229756	-0.235913	-0.227421	-0.212989	-0.16411	-0.176237	-0.250676	-0.335386	0.0793537	-0.229415	0.292456	0.354379	0.0901375	-0.0814678	0.337473	-0.131667	-0.194259	0.0228806	-0.0991631
LIHC	0.0547714	0.130289	0.186689	-0.0235908	-0.0216893	0.022505	0.310792	0.420098	0.269722	0.100493	0.244006	0.146774	0.443572	0.0585575	0.176617	0.354364	0.167709	0.519434	0.265447	-0.0245092	0.25509	-0.348068	0.140858	-0.0362061
LUAD	-0.251731	-0.231593	-0.132556	-0.256923	-0.16989	-0.0378138	-0.18774	-0.187796	-0.0279928	-0.0435252	0.0524276	-0.12574	0.0390089	-0.151614	-0.248191	0.0610477	0.236578	0.037739	-0.163778	0.0541945	-0.270415	0.010534	-0.0389783	-0.22829
LUSC	-0.277633	-0.281509	-0.221835	-0.293677	-0.165122	-0.111223	-0.146592	-0.131955	-0.0218573	-0.198741	-0.0252659	-0.0896102	0.194859	-0.171106	-0.300289	-0.181048	0.176639	0.0187066	-0.0770269	-0.0127488	-0.237451	-0.0761708	-0.088777	-0.208292
MESO	-0.331869	-0.266002	-0.120106	-0.403095	-0.362288	-0.0430305	-0.26582	-0.180488	-0.195232	-0.185554	-0.0530182	-0.135197	0.0753809	-0.222698	-0.207079	0.136418	0.0652293	0.0403149	-0.00541299	0.0572829	-0.238427	-0.209867	0.272162	-0.263014
OV	-0.267061	-0.211378	-0.0824535	-0.293528	-0.0936188	0.19047	-0.104461	-0.143097	-0.2206	-0.138324	0.0663118	-0.190516	0.272206	-0.10271	-0.27388	0.0332436	0.409563	0.116127	-0.130849	-0.0832695	-0.263795	-0.0684438	-0.223891	-0.204033
PAAD	0.007091	0.112008	0.0216977	0.0789802	0.139799	0.0702488	0.133658	0.217059	0.283996	0.217676	-0.0127864	0.00116126	0.347632	-0.0777522	0.0753353	0.283977	0.267202	0.203153	0.11315	0.172008	0.244548	-0.286571	0.115013	0.13887
PCPG	0.0806245	0.0512242	-0.0108012	-0.0614012	-0.15211	-0.316467	-0.0959816	-0.0379939	-0.10119	-0.0355204	-0.112624	-0.208987	-0.262998	-0.592364	-0.00707942	0.0708366	0.406615	0.071089	-0.106846	0.452363	0.0571228	0.0998671	-0.174088	0.312473
PRAD	-0.115338	-0.132255	-0.0473741	-0.257095	-0.23601	0.119029	-0.134643	-0.134011	-0.0594036	-0.0166208	-0.316029	-0.0855178	-0.209866	-0.479314	-0.17344	0.267551	0.484686	0.130767	0.0818845	-0.093525	-0.181481	0.238944	-0.000621037	-0.164759
READ	-0.0520628	-0.0619441	-0.00126769	-0.12606	-0.0328646	-0.0101492	-0.0279561	0.192392	0.06887	-0.0900007	-0.184243	0.00193245	0.308765	-0.0725133	-0.037621	0.232325	0.349782	0.234911	0.122304	0.0871639	0.0659584	-0.269435	-0.0170803	0.108622
SARC	-0.344299	-0.20478	-0.29736	-0.303181	-0.367582	-0.188213	-0.308817	-0.35032	-0.0716477	-0.409357	-0.217668	-0.27339	0.086395	-0.134954	-0.242337	-0.0407743	0.0259458	0.0498578	-0.361142	0.208408	-0.347334	-0.28419	0.000459123	-0.339276
SKCM	-0.238699	-0.12667	-0.0925529	-0.256339	-0.264688	-0.0347335	-0.201631	-0.195858	-0.182778	-0.222232	-0.217335	-0.23497	0.0346209	-0.237555	-0.209692	-0.0259521	0.13831	0.0110857	-0.105109	0.0893575	-0.211209	-0.0756305	-0.0724794	-0.278986
STAD	-0.0650941	0.00415792	0.0221902	0.0113503	0.0732705	0.0858566	0.0491423	0.111506	0.142579	-0.0379772	-0.0990788	-0.0025698	0.346402	0.0545928	0.0274439	0.0944399	0.370193	0.309795	0.0747104	0.0478862	0.0370597	-0.239536	-0.0776659	-0.0440623
TGCT	-0.189664	-0.18147	-0.247216	-0.289504	-0.418248	-0.103128	-0.438887	-0.361025	-0.235751	-0.282047	-0.395429	-0.310907	-0.215903	-0.367201	-0.0895671	0.299625	0.520229	0.276095	0.046786	-0.173606	-0.372186	-0.0684832	0.312491	-0.24439
THCA	-0.112391	-0.222327	-0.0675894	-0.28536	-0.0457942	0.355916	0.0278005	0.0251775	-0.0641998	-0.0551287	-0.182372	-0.29799	0.346091	-0.384993	-0.197596	0.250119	0.328889	-0.0436936	-0.254206	-0.0737305	0.0018822	0.0805866	-0.0381928	-0.135153
THYM	-0.0439892	-0.494201	-0.279221	-0.172318	-0.456608	-0.298583	-0.0690742	0.442954	-0.211397	-0.167664	-0.153879	-0.138468	0.506855	-0.38123	-0.496409	-0.0235155	-0.150497	0.259337	-0.498305	0.344725	0.0293423	-0.647969	-0.233502	0.0195292
UCEC	-0.140422	-0.17594	-0.129691	-0.242395	-0.24867	0.196948	0.0445112	-0.0174867	0.0486695	-0.0339555	0.051641	-0.212656	0.0779567	-0.319442	-0.181693	0.0166718	0.286927	0.0329853	-0.0890163	-0.00374223	-0.127052	-0.100606	-0.217867	-0.195932
UCS	-0.225434	0.124255	-0.228805	-0.315595	-0.201906	0.132681	-0.350467	-0.135468	-0.394607	-0.322012	0.0445294	-0.100337	0.192248	-0.355042	0.0582707	0.295955	0.164765	-0.0975499	0.113236	-0.134949	-0.24287	-0.323956	-0.135857	-0.0412899
UVM	-0.0160572	-0.157267	0.302063	-0.138256	-0.28399	0.168612	-0.242335	-0.0876465	-0.378973	-0.325762	-0.46451	-0.110783	-0.4688	-0.460431	0.0371308	0.57888	0.56444	0.13256	0.0329348	0.0349742	0.0482654	-0.273605	0.201031	-0.218098
ACC, adrenocortical carcinoma; BLCA, bladder urothelial carcinoma; BRCA, breast invasive carcinoma; CESC, cervical squamous cell carcinoma and endocervical adenocarcinoma; CHOL, cholangiocarcinoma; COAD, colon adenocarcinoma; DLBC, lymphoid neoplasm diffuse large B-cell lymphoma; ESCA, esophageal carcinoma; GBM, glioblastoma multiforme; HNSC, head and neck squamous cell carcinoma; KICH, kidney ch…
